# Supplementary material for: Graphitized porous carbon nanofibers prepared by electrospinning as anode materials for lithium ion batteries
Source: Royal Society of Chemistry journal article supplement (doi:10.1039/c6ra15076d), 2016-01-01
Supplement: c6ra15076d1.pdf [file c6ra15076d1.pdf]

Supporting Information for

## Graphitized Porous Carbon Nanofibers Prepared by Electrospinning as Anode Materials for Lithium Ion Batteries

Shoupu Zhu, Jing Sun, Tian Wu, Xun Su, Haiming Su, Shanshan Qu, Yongjuan Xie, Ming Chen\* and  
Guowang Diao\*

College of Chemistry and Chemical Engineering, Yangzhou University, Yangzhou 225002, P. R. China

Key Laboratory of Environmental Materials & Environmental Engineering of Jiangsu Province,

Yangzhou 225002, Jiangsu, P. R.China

\* Corresponding author. Tel.: +86 514 87975436; fax: +86 514 87975244.

E-mail address: gwdiao@yzu.edu.cn (G. Diao), chenming@yzu.edu.cn (M. Chen).

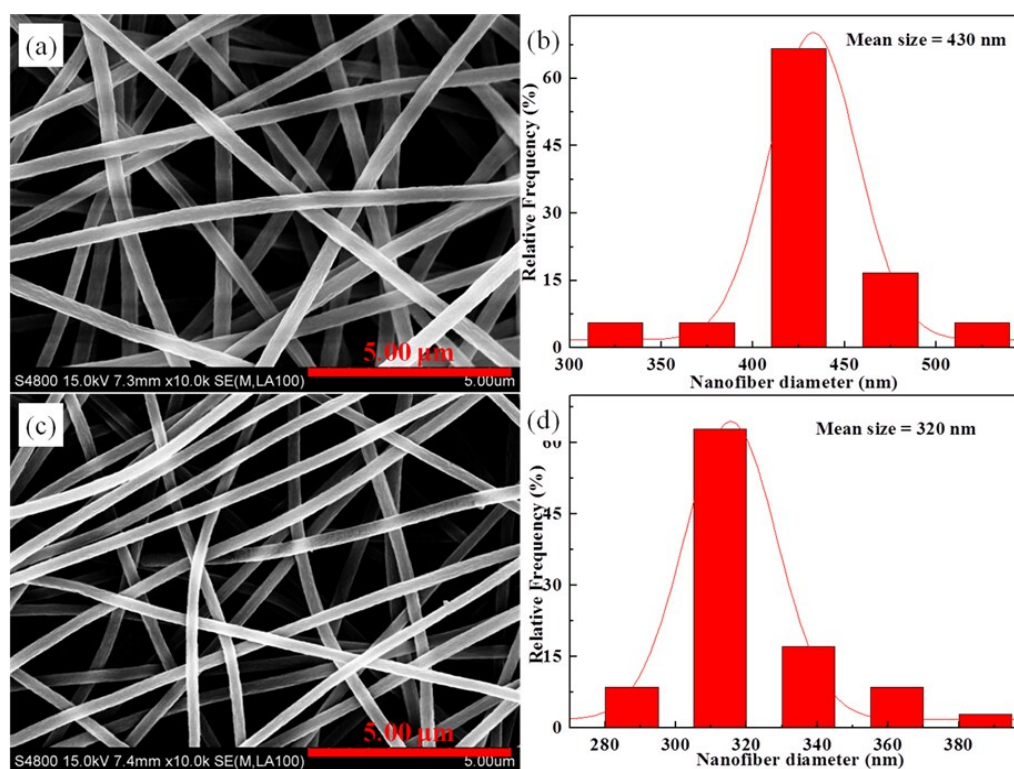

Fig. S1 SEM images and relevant diameter distributions of PAN-250 (a) (b) and PAN-1000 (c) (d).

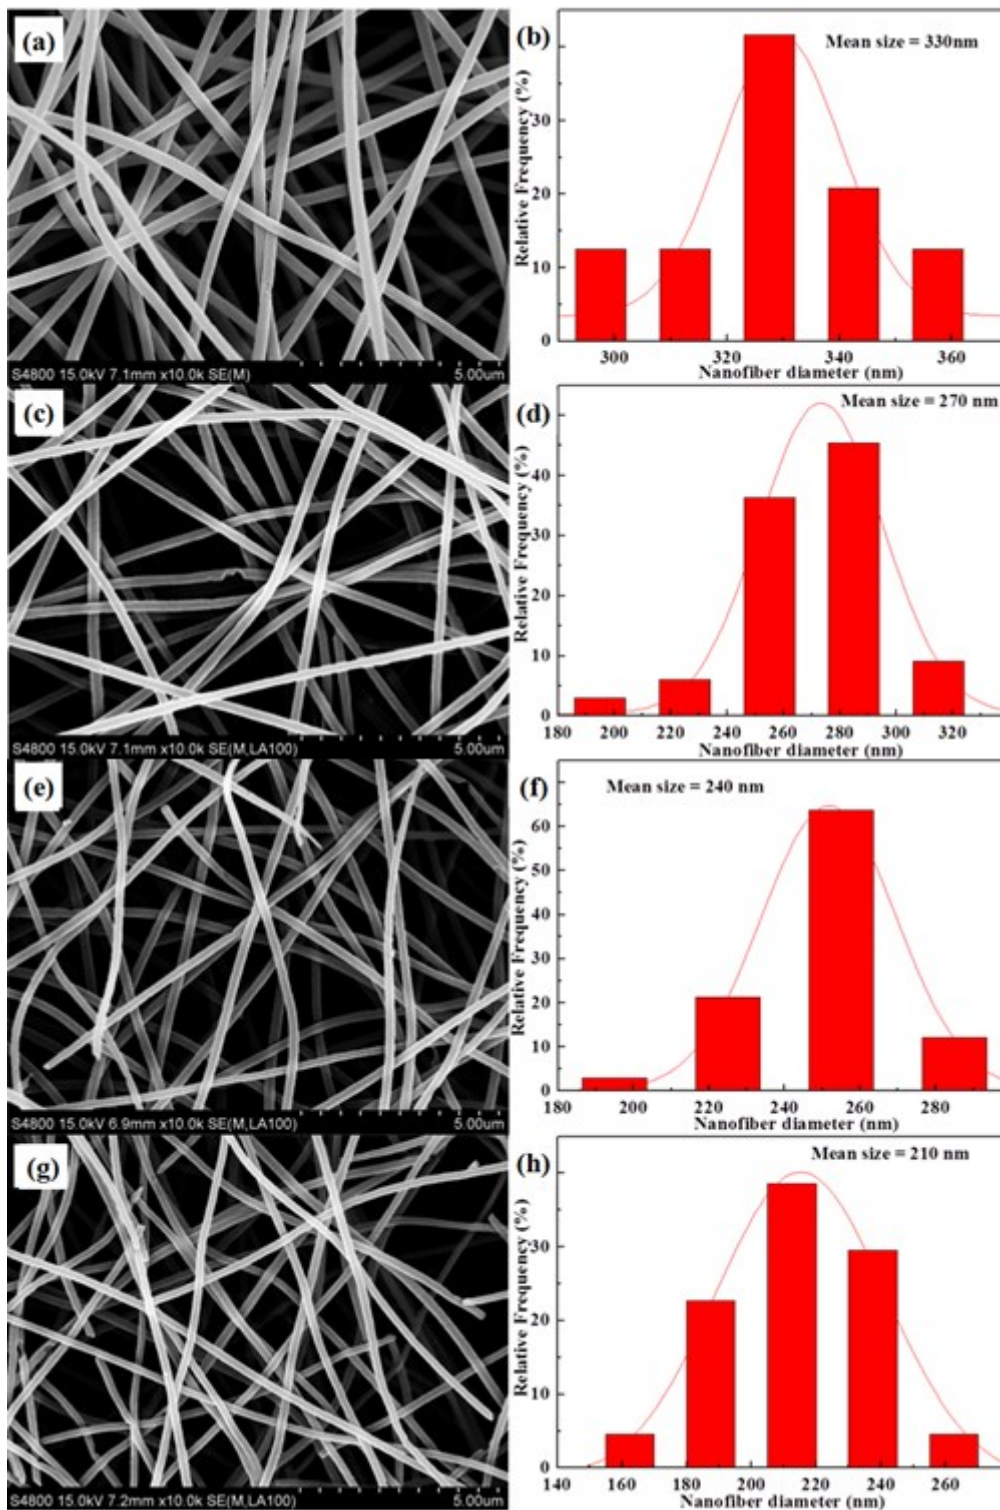

**Fig. S2** SEM images and relevant diameter distributions of PAN-400 (3 h) (a) (b), PAN-400 (5 h) (c) (d), PAN-400 (12 h) (e) (f) and PAN-400 (18 h) (g) (h).

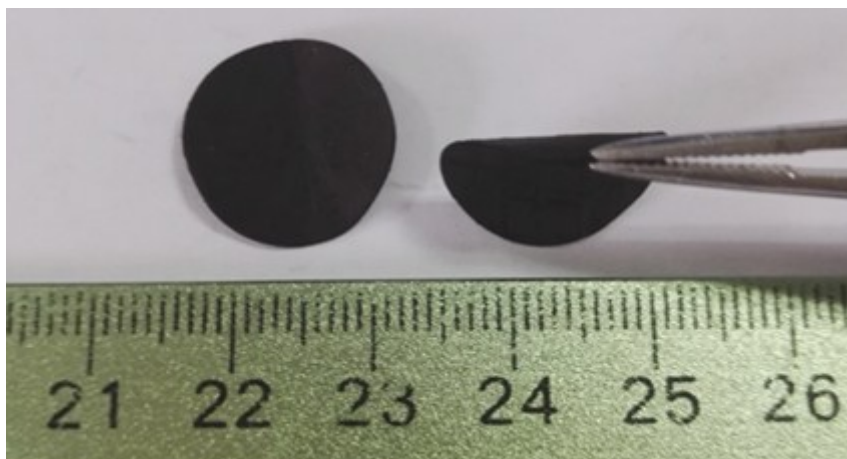

**Fig. S3** Picture of flexible PAN-400 (18h) electrodes.
